# Supplementary material
Source: ML conference proceedings conference paper supplement (https://openreview.net/forum?id=MeYI0QcOIRg)
Supplement: supplementary_material [file attachment]

## 531 A Limitations of Theorem 1

532 While Theorem 1 provides an understanding of the tradeoff between adversarial and natural distribu-  
 533 tional robustness, there are some limitations. Firstly, the results consider a setting where the core and  
 534 spurious features are completely disentangled, i.e, they each represent different parts of the input. In  
 535 practice, spurious features may be entangled with the core features (e.g., the color of an image may  
 536 represent a spurious feature.) In addition, our results mainly consider the *goal* of adversarial training  
 537 as we focus on the expected loss  $L_{p,\epsilon}(\theta)$ , rather than its finite-sample variant. This is because even  
 538 for an  $\ell_2$  adversary, characterizing the finite-sample behaviour of adversarial training is difficult and  
 539 requires careful assumptions on the asymptotic behaviour of the parameters (e.g., see Theorem 3.3 in  
 540 [26]). We leave exploring these directions to future work. Even so, we believe our theoretical results  
 541 are of interest to the community since disjoint features already capture a wide variety of spurious  
 542 correlations, e.g., background correlations, as well as examples where a spurious object is present in  
 543 the image. The main goal of our theoretical analysis is to show the existence of explicit tradeoffs  
 544 between adversarial and distributional robustness and build practical insights using those results.

## 545 B Societal Impact

546 Our work touches on two important notions of robustness for the safe and fair deployment of deep  
 547 models in the wild. We hope our results lead to careful analysis of all modes of robustness, and the  
 548 interplay between them, before deep models are used in sensitive applications. While our results  
 549 create tension with some previous works [71, 75, 25], we stress that we do not wish to diminish their  
 550 work; instead, we hope our work reveals the vast nuance associated with spurious correlations, which  
 551 can help and hurt models in various ways. Lastly, we release all code to encourage future work.

## 552 C Additional results for the $\ell_1$ norm

553 In this section, we further analyze the plateauing behaviour of the performance of the linear model  
 554 observed in Figure 2 when using  $\ell_1$  adversarial training. To this end, we consider different values for  
 555 the number of core features  $c$  and total features  $m$  and measure NFS for different values of adversarial  
 556 budget  $\epsilon$  as in Figure 2. The matrix  $\Sigma$  is constructed using Equation (4) as before, with modified  
 557 number of rows and columns based on the values of  $c, p$ . Similarly,  $\theta^{\text{opt}}$  is constructed as before, with  
 558 the core coordinates set to 1 and the spurious coordinates set to 0. The value of  $\eta$  is fixed at 0.5. The  
 559 results are shown in Figure 10.

560 As shown in the Figure, when using  $m$  total features and  $c$  core features, NFS plateaus at  $\frac{m-c}{m}$  for  
 561 large values of  $\epsilon$ . Intuitively, this is because of the structure of the optimization problem (2). Recall  
 562 that when using the  $\ell_1$  norm, the value of  $q$  in (2) equals  $\infty$ . As such, adversarial training tries to find  
 563 a parameter  $\theta$  that has a low  $\ell_\infty$  norm and is “close” (as measured by  $\sigma_\theta$ ) to  $\theta^{\text{opt}}$ . The  $\ell_\infty$  penalty  
 564 encourages values of  $\theta$  that are uniform across the coordinates. Since there are  $m - c$  spurious  
 565 features and  $m$  total features, this leads to models that have an NFS value of  $\frac{m-c}{m}$ .

## 566 D Proof of Theorem 1

567 *Proof.* We first claim that

$$\max_{\|\delta\| \leq \epsilon} (Y - \langle X + \delta, \theta \rangle)^2 = \left( |\langle y, x \rangle| + \epsilon \cdot \|\theta\|_q \right)^2$$

568 To see why this holds, note that for all  $\delta$  satisfying  $\|\delta\|_p \leq \epsilon$ ,

$$\begin{aligned} |Y - \langle X + \delta, \theta \rangle| &\stackrel{(a)}{\leq} |Y - \langle X, \theta \rangle| + |\langle \delta, \theta \rangle| \\ &\stackrel{(b)}{\leq} |Y - \langle X, \theta \rangle| + \epsilon \cdot \|\theta\|_q, \end{aligned}$$

569 where (a) follows from the triangle inequality and (b) follows from Hölder’s inequality. With a  
 570 suitable choice of  $\theta$ , we can achieve equality for (b). As  $\|\theta\|_q = \|\theta\|_q$ , at least one of  $\{\theta, -\theta\}$

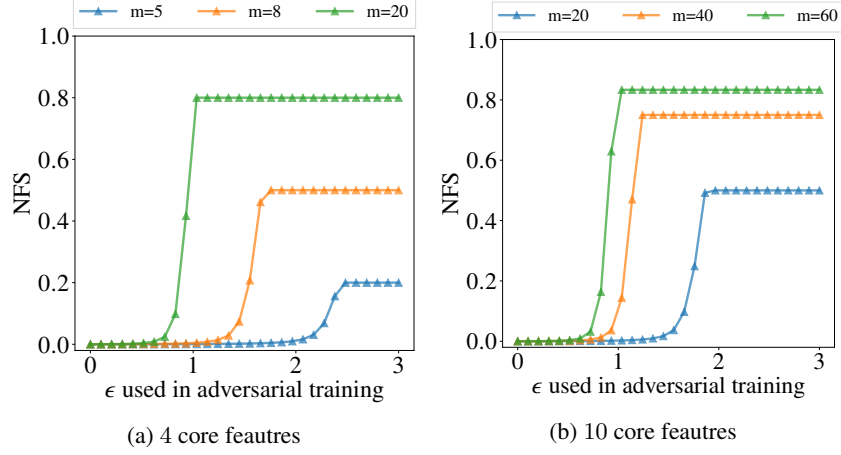

Figure 10: Analysis of NFS for the linear model when using the  $\ell_1$  norm in adversarial training. Each figure measures the reliance of the model on spurious features (measured by NFS) while varying the adversarial training budget  $\epsilon$ , using different number of *total* features  $m$ . The number of core features is kept constant and set to 4 in Figure (a) and to 10 in Figure (b).

would further achieve equality for (a). As maximizing  $|\cdot|$  is equivalent to maximizing  $(\cdot)^2$ , (3) is proved.

Given (3), we can rewrite (1) as

$$\begin{aligned} L_{p,\epsilon} &= \mathbb{E} \left[ \left( |Y - \langle X, \theta \rangle| + \epsilon \cdot \|\theta\|_q \right)^2 \right] \\ &= \mathbb{E} \left[ (Y - \langle X, \theta \rangle)^2 \right] + \epsilon^2 \cdot \|\theta\|_q^2 + 2 \cdot \epsilon \cdot \mathbb{E} [|Y - \langle X, \theta \rangle|] \\ &\stackrel{(a)}{=} \mathbb{E} \left[ (\langle X, \theta - \theta^{\text{opt}} \rangle + W)^2 \right] + \epsilon^2 \cdot \|\theta\|_q^2 + 2 \cdot \epsilon \cdot \mathbb{E} [|\langle X, \theta - \theta^{\text{opt}} \rangle + W|], \end{aligned}$$

Where for (a) we have used the fact that  $Y = \langle X, \theta \rangle + W$ .

Define  $v_\theta$  as  $\langle X, \theta - \theta^{\text{opt}} \rangle + W$ . As  $X$  was assumed to be sampled from  $N(0, \Sigma)$ ,  $v_\theta$  is distributed as  $N(0, \sigma_\theta^2)$ . It follows that

$$\begin{aligned} L_{p,\epsilon} &= \mathbb{E} \left[ (\langle X, \theta - \theta^{\text{opt}} \rangle + W)^2 \right] + \epsilon^2 \cdot \|\theta\|_q^2 + 2 \cdot \epsilon \cdot \mathbb{E} [|\langle X, \theta - \theta^{\text{opt}} \rangle + W|], \\ &= \mathbb{E} [v_\theta^2] + \epsilon^2 \cdot \|\theta\|_q^2 + 2 \cdot \epsilon \cdot \mathbb{E} [|v_\theta|] \\ &\stackrel{(a)}{=} \sigma_\theta^2 + \epsilon^2 \cdot \|\theta\|_q^2 + 2 \cdot \epsilon \cdot \sigma_\theta \\ &= (c_1^2 + c_2) \cdot \sigma_\theta^2 + \epsilon^2 \cdot \|\theta\|_q^2 + 2 \cdot \epsilon \cdot \sigma_\theta \\ &= c_2 \cdot \sigma_\theta^2 + (c_1 \sigma_\theta + \epsilon \cdot \|\theta\|_q)^2 \end{aligned}$$

where for (a) we have used the fact that  $\mathbb{E} [|N(0, \sigma^2)|] = c_1 \cdot \sigma$ . This proves (2) as claimed.

As for convexity,  $\sigma_\theta$  is convex in  $\theta$  since it can be written as  $\left\| [\Sigma^{\frac{1}{2}}(\theta - \theta^{\text{opt}}), \sigma_w] \right\|_2$  where  $[\cdot, \cdot]$  denotes the vector stacking operation. As  $c_1 \sigma_\theta + \epsilon \cdot \|\theta\|_q$  is always positive and  $x \rightarrow x^2$  is convex and increasing for  $x \geq 0$ , this implies that  $(c_1 \sigma_\theta + \epsilon \cdot \|\theta\|_q)^2$  is convex as well. Finally  $c_2 \sigma_\theta^2$  is convex as  $c_2 > 0$  and therefore (1) is convex in  $\theta$ .  $\square$

## E Additional Details on Reverse Effect (Section 4.3)

Our final empirical observation is that the presence of a spurious feature (in both training and test distributions) can lead to increased adversarial robustness. This more directly creates tension with claims that adversarial vulnerability is born out of spurious feature reliance. We refer to this as the

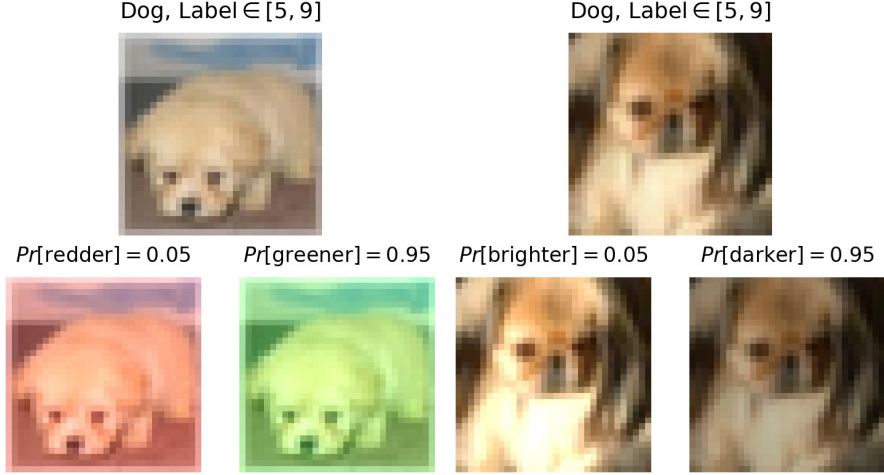

Figure 11: Color Shift,  $\rho = 19 : 1$

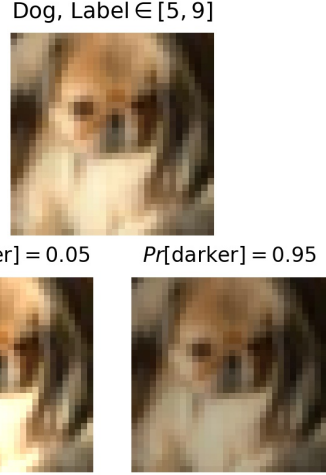

Figure 12: Lighting Shift,  $\rho = 19 : 1$

‘reverse effect’, in relation to our primary empirical and theoretical finding that adversarial training increases spurious feature reliance. We now elaborate on the experimental setup discussed in Section 4.3 reproduce the results with a different spurious feature, and finally appeal to ImageNet-9 to demonstrate this effect using a more realistic spurious feature (i.e. backgrounds).

## E.1 Experimental Setup

**Overview.** We inject spurious correlations to the CIFAR10 dataset. Based on the class label, we adjust half the images (i.e. with class label from 5 to 9) to shift in one direction with high probability. For example, a dog image is made greener with probability 0.95, corresponding to a majority-to-minority group ratio of  $\rho = 19 : 1$ . With probability 0.05, we shift in the other direction (e.g. make redder). We then standardly train a ResNet18 from scratch on the dataset with the spurious feature injected for the 10-way CIFAR classification task. Importantly, we evaluate robust accuracy with the spurious feature retained, and then compare adversarial robustness of models trained under data with different strengths of the injected spurious correlation. Figure 9 and 13 show that for two distinct spurious features (color and lighting), robust accuracy is higher when the spurious correlation is stronger. Notably, the gain is larger than the gain in standard accuracy. Intuitively, we see that relying on the predictive power of the spurious feature is helpful for standard accuracy, and especially for accuracy under adversarial attack. Despite being irrelevant to the true labeling function, the spurious feature can improve model performance, and indeed even lead to better adversarial robustness.

**Details.** Color shift is achieved by increasing all pixel intensities along one channel by 0.25. Lighting shift is achieved by simply scaling an input by 1.25 to make brighter or 0.75 to make darker. All images are clamped to remain in the  $[0, 1]$  pixel range after spurious feature injection. Models are trained for 20 epochs using an Adam optimizer with a learning rate of 0.001 and weight decay of  $1e - 4$ .

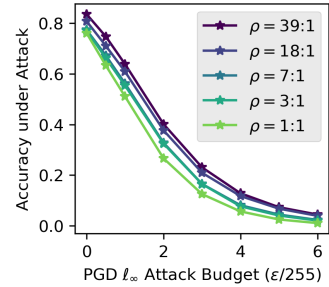

Figure 13: Reverse effect using spurious feature of *lighting*. Main text figure uses color as spurious feature.

## E.2 Leveraging ImageNet-9

We now demonstrate the observed reverse effect on the higher resolution ImageNet-9 dataset, leveraging the natural and ubiquitous spurious feature of backgrounds. We finetune pretrained models on MIXED-SAME and MIXED-RAND separately, and evaluate each model’s accuracy under attack on the same split that they were trained over. Further, we leverage the adversarially trained models from test suite in this experiment. This way, accuracy under attack is more informative, as the models

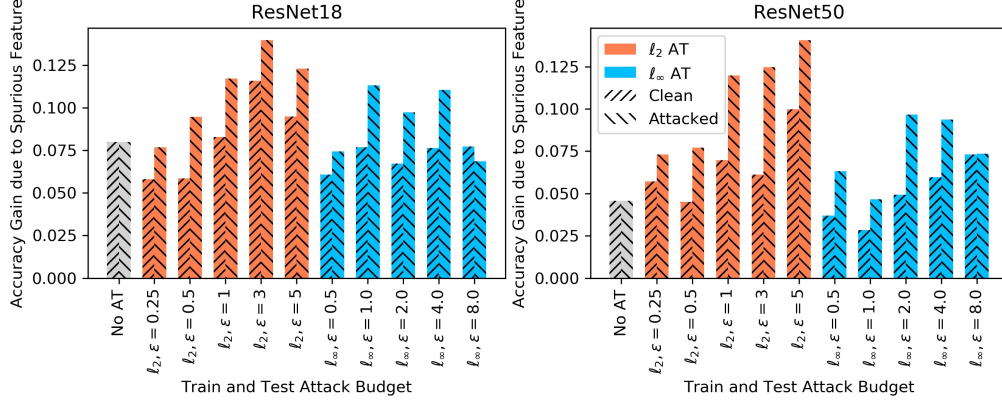

Figure 14: Background Gap (difference in accuracy on MIXED-SAME and MIXED-RAND) for clean and adversarially attacked images. Across models, background gap is larger when considering accuracy under attack, suggesting that the presence of a spurious correlation in training data makes the model more adversarially robust over the same distribution.

are trained to expect attacks (i.e. we are not imposing any distribution shifts that would lead to unexpected model behavior). Along this vain, we attack each backbone with the same norm and  $\epsilon$  that it was pretrained over.

Figure 14 shows the gain in accuracy for the models trained and evaluated on MIXED-SAME compared to those using MIXED-RAND. We see that the presence of background correlations increases both standard and robust accuracy for all models (i.e. gains are positive). Further, gains in accuracy under attack are larger than gains in standard accuracy in nearly all cases. Thus, it seems like the added predictive power of the spurious background feature has a significantly nontrivial impact on improving adversarial robustness, contradicting many existing arguments on the link between spurious correlations and adversarial vulnerability.

## F Adversarially Robust Model Test Suite (Section 3)

### F.1 Model Details

We utilize the treasure trove of open-source adversarially trained models, contributed by [49], accessible at <https://github.com/Microsoft/robust-models-transfer>. For completeness, we now provide details on the models we use, though we refer readers to Appendix A.1 of the original text, where the information we share now is sourced.

**Training** All models were trained on ImageNet in batches of 512 samples, using SGD optimizer with momentum of 0.9 and weight decay of  $1e - 4$ , for a total of 90 epochs, with learning rate dropping by a factor of 10 every 30 epochs. The standard procedure of [38] was performed to adversarially train models, using 3 projected gradient descent steps with a step size  $\frac{2}{3}\epsilon$  for the attack budget  $\epsilon$ .

**Selected Models** We focus our empirical study on the ResNet architecture [20] because of its wide spread popularity. Specifically, we study ResNet18s and ResNet50s that are adversarially trained under the  $\ell_2$  norm, for  $\epsilon \in \{0.25, 0.5, 1, 3, 5\}$ , and  $\ell_\infty$  norm, for  $\epsilon \in \{0.5/255, 1/255, 2/255, 4/255, 8/255\}$ , as well as standardly trained baselines.

Table 1 shows the standard accuracies for these models. Note that we at times compare between the  $\ell_2$  and  $\ell_\infty$  adversarially trained models (e.g. figure 6). We acknowledge that direct comparisons are challenging because the threat model under which adversarial robustness is optimized for are different. However, we note that standard accuracies of the  $i^{th}$   $\ell_2$  AT model is roughly the same as that of the  $i^{th}$   $\ell_\infty$  AT model, suggesting that those models lie in similar points of the accuracy-robustness tradeoff.

**Additional Models.** We extend our analysis to other architectures. We replicate all pretrained-model experiments on the Wide ResNet50 (2x) backbones, for which we have checkpoints for each of the five  $\epsilon$  values for both  $\ell_2$  and  $\ell_\infty$  norms. We also inspect MobileNetv2 [51], DenseNet161 [24],

| AT Norm         | $\epsilon$ | ResNet18 | ResNet50 | Wide ResNet50 (2x) |
|-----------------|------------|----------|----------|--------------------|
| No Adv Training |            | 69.79    | 75.80    | 76.97              |
| $\ell_2$        | 0.25       | 67.43    | 74.14    | 76.21              |
| $\ell_\infty$   | 0.5/255    | 66.13    | 73.73    | 75.82              |
| $\ell_2$        | 0.5        | 65.49    | 73.16    | 75.11              |
| $\ell_\infty$   | 1/255      | 63.46    | 72.05    | 74.65              |
| $\ell_2$        | 1          | 62.32    | 70.43    | 73.41              |
| $\ell_\infty$   | 2/255      | 59.63    | 69.10    | 72.35              |
| $\ell_2$        | 3          | 53.12    | 62.83    | 66.90              |
| $\ell_\infty$   | 4/255      | 52.49    | 63.86    | 68.41              |
| $\ell_2$        | 5          | 45.59    | 56.13    | 60.94              |
| $\ell_\infty$   | 8/255      | 42.11    | 54.53    | 60.82              |

Table 1: Clean ImageNet accuracy for test suite of  $\ell_2$  and  $\ell_\infty$  adversarially trained ResNets over varying  $\epsilon$ . Observe that the  $i^{th}$   $\ell_2$  AT model has similar clean accuracy to the  $i^{th}$   $\ell_\infty$  AT model.

|                             | ShuffleNet | MobileNet | VGG   | DenseNet | ResNeXt |
|-----------------------------|------------|-----------|-------|----------|---------|
| No AT                       | 64.25      | 65.26     | 73.66 | 77.37    | 77.38   |
| $\ell_2$ AT, $\epsilon = 3$ | 43.32      | 50.40     | 57.19 | 66.98    | 66.25   |

Table 2: Clean ImageNet accuracy for five additional architectures considered.

653 ResNeXt50\_32x4d [68], ShuffleNet [74], and VGG16\_bn [56]. For each of these five architectures,  
654 we compare an  $\ell_2$  adversarially trained model with  $\epsilon = 3$  to a standardly trained baseline.

## 655 F.2 Experimental Details

656 **ObjectNet and ImageNet-C** [5, 22]. We report raw accuracies under noise, blur, and digital  
657 corruption types for ImageNet-C, as opposed to relative corruption error. For ObjectNet, we map  
658 ImageNet predictions to the set of 113 overlapping classes in ObjectNet. **RIVAL10 (RFS) and**  
659 **Salient ImageNet-1M (RCS)** [40, 59]. *RFS* computation requires finetuning a final linear layer  
660 over fixed features for the coarse-grained ten way RIVAL10 classification. *RCS* operates on models  
661 off the shelf, directly inspecting accuracies over ImageNet classes (and samples, with region-based  
662 noise corruption). **ImageNet-9 and Waterbirds** [67, 48]. ImageNet-9 accuracies are obtained  
663 by mapping off-the-shelf model predictions to the nine coarse labels deterministically. Waterbirds  
664 requires finetuning, which we do over fixed features. For RIVAL10 and Waterbirds finetuning, we  
665 use Adam with learning rate of  $1e - 4$  and weight decay of  $1e - 5$  for 20 and 15 epochs respectively.

## 666 F.3 Results on Extended Model Test Suite

667 We now corroborate all our empirical findings on new backbones, expanding our analysis to 21 new  
668 models (including 10 AT WideResNet50s over both  $\ell_2$  and  $\ell_\infty$  norms) over six architectures.

669 **WideResNets.** We corroborate all our empirical findings  
670 on ResNet18s and ResNet50s on the WideResNet50 (2x)  
671 architecture. Figure 15 shows that accuracy drop in AT  
672 models is more severe on distribution shifts that break  
673 spurious correlations (ObjectNet), unlike the accuracy  
674 drop due to corruption of both core and spurious fea-  
675 tures (ImageNet-C), which can likely be explained by  
676 the reduced standard accuracy of AT models.

677 Figure 16 shows reduced sensitivity to core and  
678 foreground regions for AT models. Again, the effect is  
679 more pronounced for  $\ell_2$  adversarially training and for  
680 larger  $\epsilon$ . Also, we again see that decrease in *RCS* is less  
681 consistent than the drop in *RFS*. We conjecture that

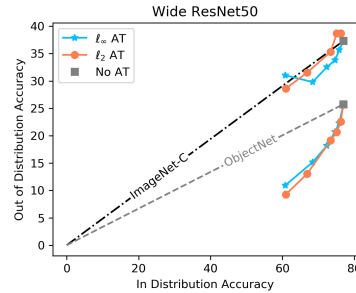

Figure 15: ObjectNet, ImageNet-C, and ImageNet accuracies for WideResNet50s.

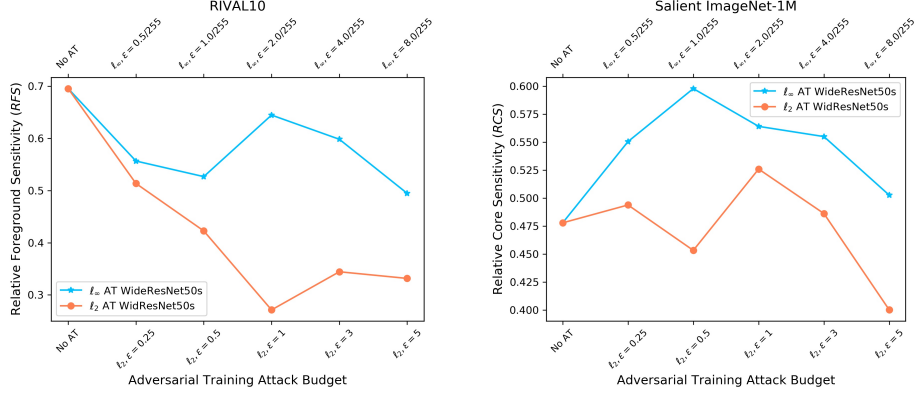

Figure 16: *RFS* and *RCS* for WideResNet50s. Sensitivity to core and foreground regions are reduced for higher  $\epsilon$ , especially for  $\ell_2$  AT models and for *RFS*, computed over the RIVAL10 dataset, where background correlations are stronger.

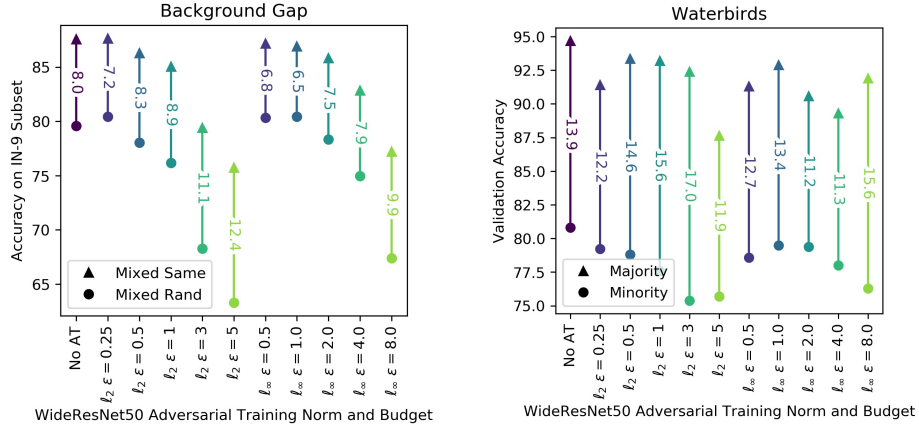

Figure 17: Background Gap (IN-9) and Waterbirds gap for WideResNet50s. AT models, especially under  $\ell_2$  norm, see larger accuracy drops when spurious correlations are broken.

the diversity and fine-grain Salient ImageNet classification task reduces the strength of spurious correlations present in the data, thus diluting our observed effects of adversarial training on spurious feature reliance.

Lastly, figure 17 shows the drop in accuracy due to breaking spurious background correlations is larger for AT models. Indeed, the absolute background gap (IN-9) for the WideResNet50 under  $\ell_2$  AT with  $\epsilon = 5$  is 50% larger than the gap for the standardly trained baseline. We note that the absolute gaps are smaller in some cases. We believe the lower standard accuracy of AT models may contribute to this, as there is less accuracy to drop from. Nonetheless, it is intriguing that in some cases,  $\ell_\infty$  adversarial training seems to reduce spurious feature reliance; while our theory explains how a spurious feature can be completely ignored under  $\ell_\infty$  training, it does not explain cases where spurious feature reliance is reduced compared to standard training. We believe this is an interesting direction for future work.

**Other backbones.** We now show results for ten other models, half of which are  $\ell_2$  adversarially trained with  $\epsilon = 3$ , while the others are standardly trained. Figure 18 summarizes our results, corroborating each of our empirical findings.

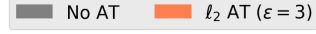

(a) Legend. We compare  $\ell_2$  adversarially trained models to standardly trained baselines for five new backbones.

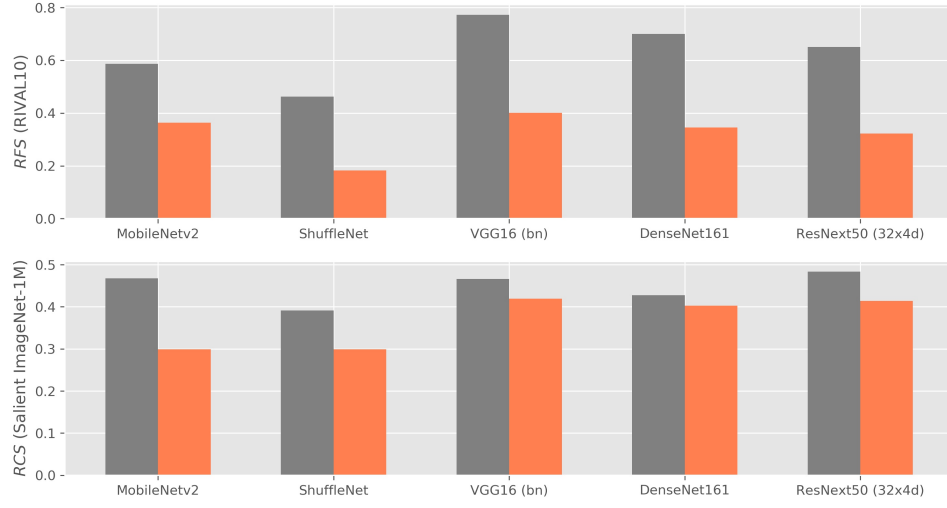

(b) Lower *RFS* (*RCS*) entails Lower Foreground (Core Feature) Sensitivity

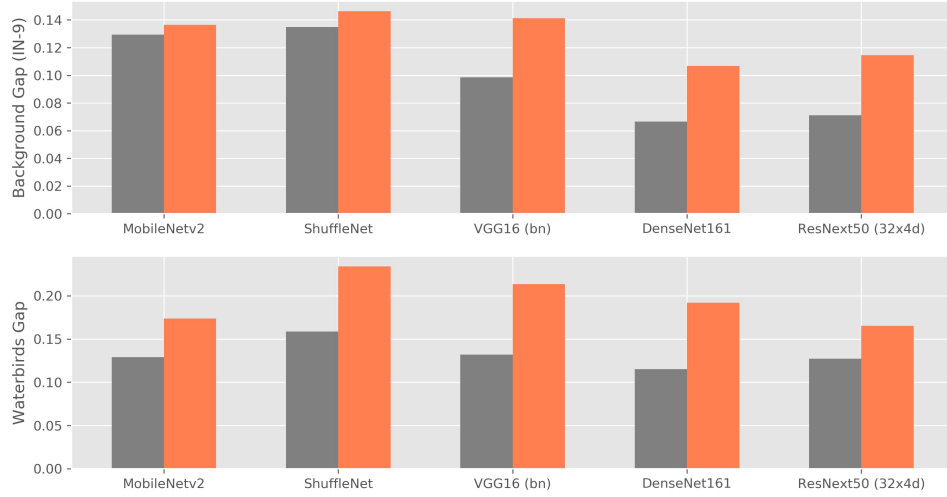

(c) Higher Gap entails Greater Background/Spurious Sensitivity

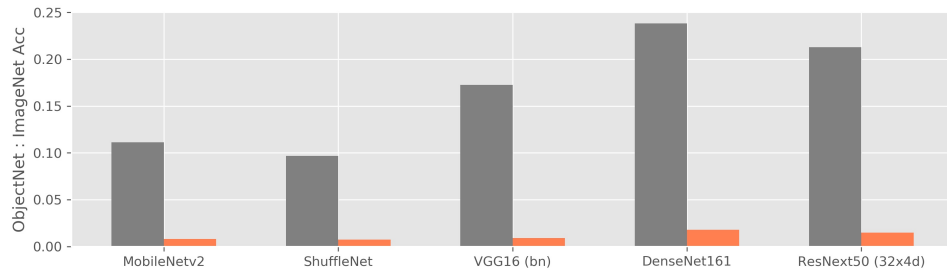

(d) Lower Ratio entails Lower Natural Distributional Robustness

Figure 18: Corroborating findings on additional backbones.
